# Supplementary material for: The Glitazone Class of Drugs as Carbonic Anhydrase Inhibitors—A Spin-Off Discovery from Fragment Screening
Source: MDPI journal article supplement (doi:10.3390/molecules26103010), 2021-05-18
Supplement: s1 [file s1]

*Supplementary Materials*

# **The Glitazone Class of Drugs as Carbonic Anhydrase Inhibitors—A Spin-Off Discovery from Fragment Screening**

Sarah L. Mueller <sup>1,2,3</sup>, Panagiotis K. Chrysanthopoulos <sup>1</sup>, Maria A. Halili <sup>1,2</sup>, Caryn Hepburn <sup>4</sup>, Tom Nebl <sup>3</sup>, Claudiu T. Supuran <sup>5</sup>, Alessio Nocentini <sup>5</sup>, Thomas S. Peat <sup>3</sup> and Sally-Ann Poulsen <sup>1,2,\*</sup>

## **Contents:**

Hydrogen-Deuterium Exchange Mass Spectrometry: Figure S1-6

Protein X-ray Crystallography: Table S1

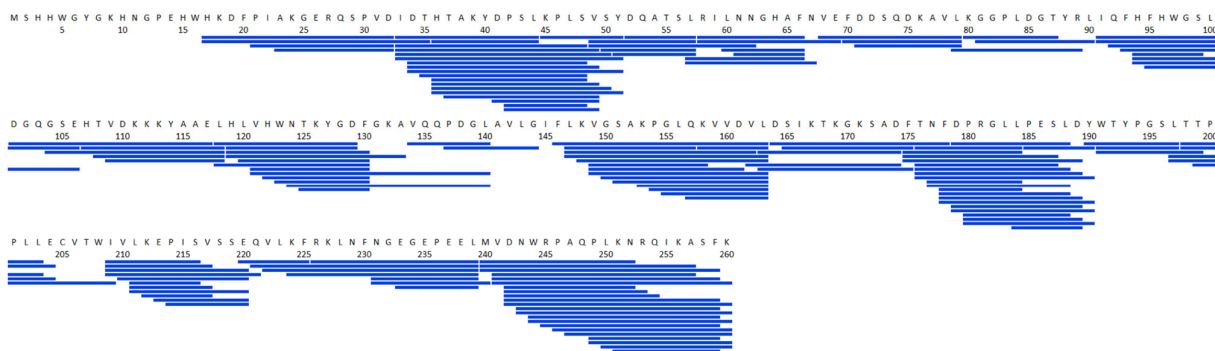

**Figure S1.** Sequence coverage (93.5%) and coverage redundancy (7.67) of the pepsin digested hCAII. A total of 159 peptides are depicted in blue bars.

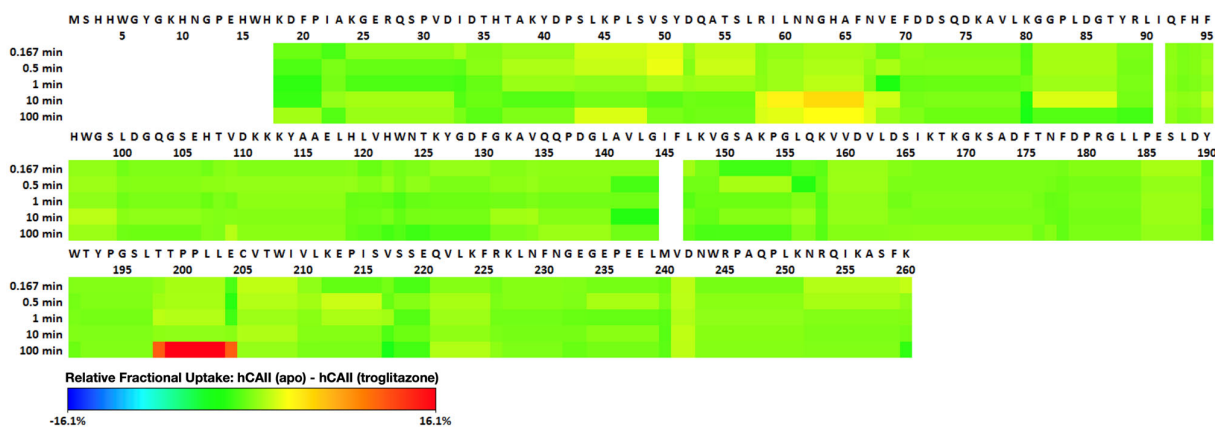

**Figure S2.** Heat map showing the relative fractional uptake in % apo (no compound) and bound to troglitazone **11**.

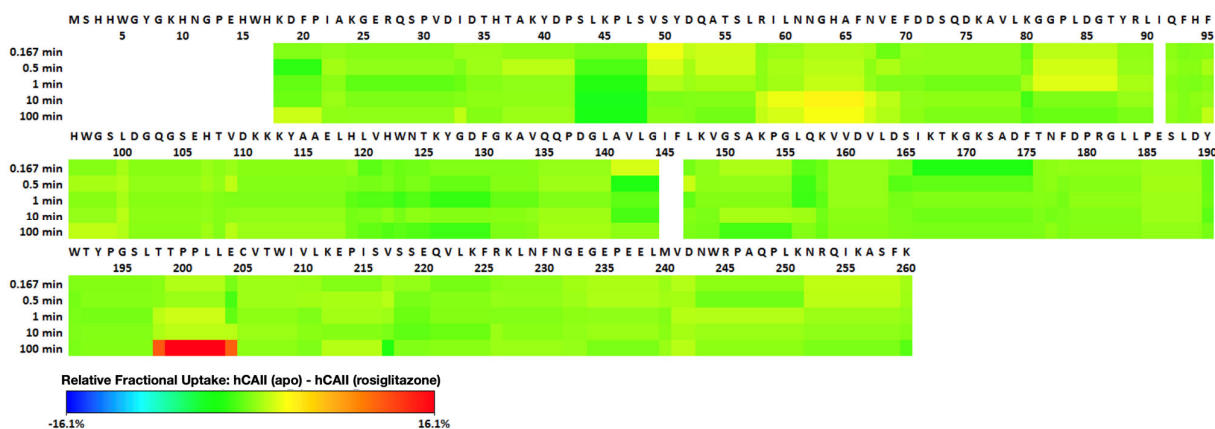

**Figure S3.** Heat map showing the relative fractional uptake in % between apo (no compound) and bound to rosiglitazone **12**.

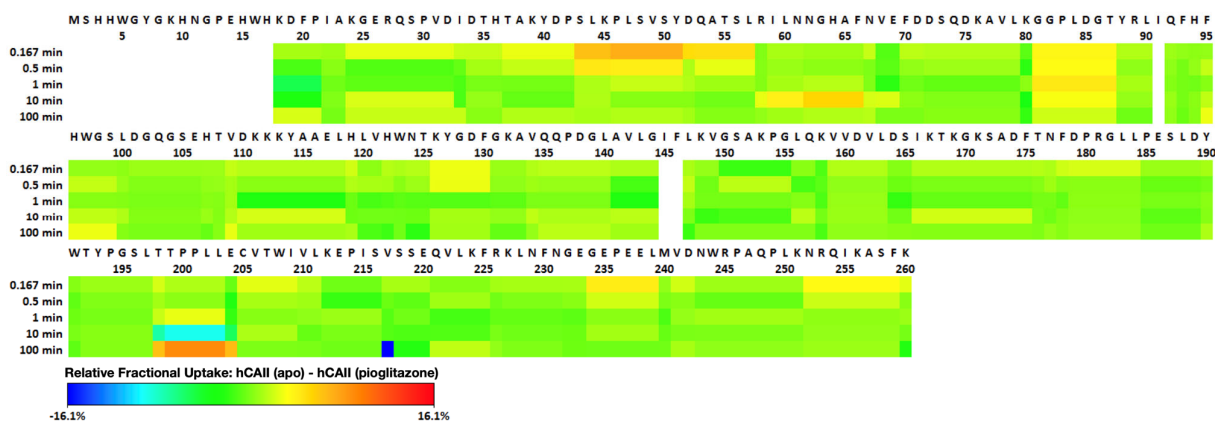

**Figure S4.** Heat map showing the relative fractional uptake in % between apo (no compound) and bound to pioglitazone 13.

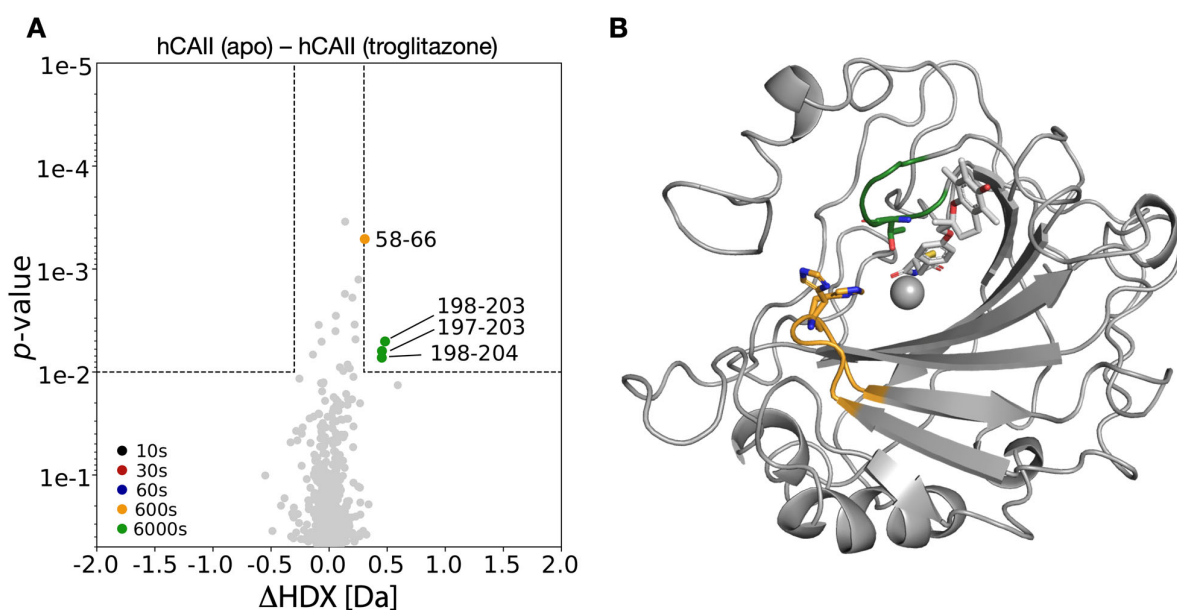

**Figure S5. A.** Volcano plot [59] showing the average  $\Delta\text{HDX}$  calculated by subtracting either hCA II with troglitazone 11 from apo (protein alone) after 10 s, 30 s, 60 s, 600 s and 6000 s exposure. Significance cut-off values are  $p\text{-value} < 0.01$  and an average  $\Delta\text{HDX} > 0.3$  Da. Significant peptides are shown in green (6000 s) or orange (600 s). **B.** Crystal structure of hCA II bound to troglitazone 11 (shown in grey sticks) coordinated to the zinc ion (shown as a grey sphere). Significant regions are coloured in green or orange with proton shuttle His64 (orange) and Thr199 (green) marked as sticks.

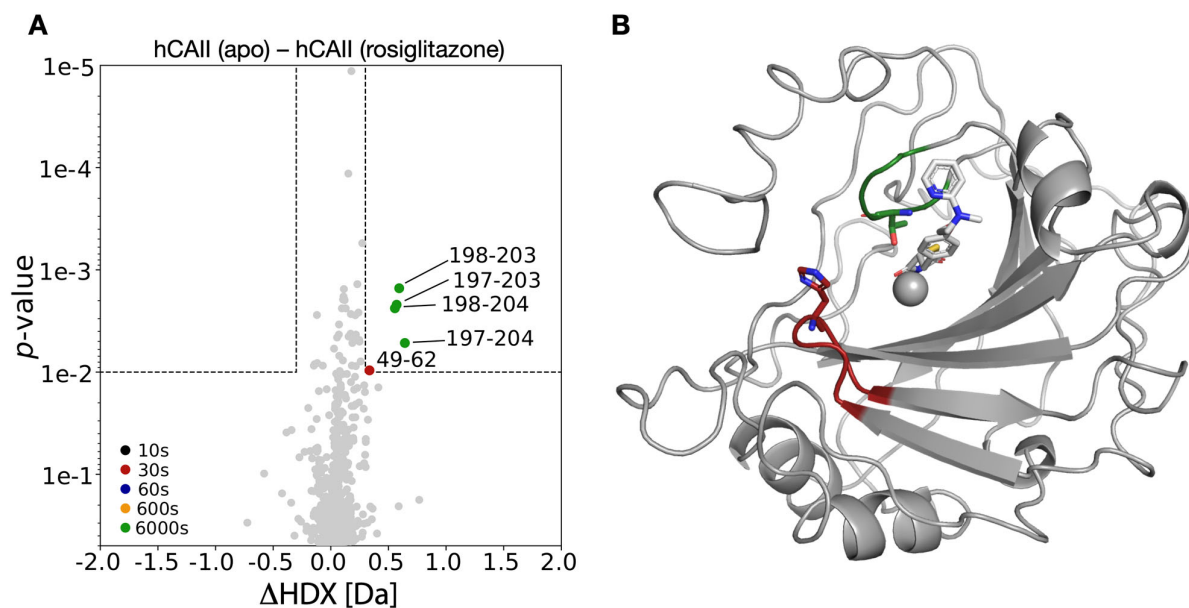

**Figure S6.** **A.** Volcano plot [59] showing the average  $\Delta\text{HDX}$  calculated by subtracting either hCA II with rosiglitazone **12** from apo (protein alone) after 10 s, 30 s, 60 s, 600 s and 6000 s exposure. Significance cut-off values are  $p$ -value < 0.01 and an average  $\Delta\text{HDX}$  > 0.3 Da. Significant peptides are shown in green (6000 s) or red (30 s). **B.** Crystal structure of hCA II bound to rosiglitazone **12** (shown in grey sticks) coordinated to the zinc ion (shown as grey sphere). Significant peptides are coloured in green or red with proton shuttle His64 (red) and Thr199 (green) marked as sticks.

**Table S1.** Protein X-ray crystallography data collection and structure refinement statistics.

| <b>PDB</b>                  | <b>7M23</b>      | <b>7M24</b>      | <b>7M26</b>      |
|-----------------------------|------------------|------------------|------------------|
| <b>Compound</b>             | <b>11</b>        | <b>12</b>        | <b>13</b>        |
| Space group                 | P2 <sub>1</sub>  | P2 <sub>1</sub>  | P2 <sub>1</sub>  |
| Cell dimensions             |                  |                  |                  |
| a, b, c                     | 42.3, 41.3, 71.7 | 42.6, 41.3, 71.9 | 42.4, 41.4, 72.1 |
| alpha, beta, gamma          | 90, 104.4, 90    | 90, 104.4, 90    | 90, 104.4, 90    |
| Resolution (Å)              | 41.3–1.30        | 41.3–1.30        | 41.4–1.30        |
| Resolution-high (Å)         | 1.32–1.30        | 1.32–1.30        | 1.32–1.30        |
| Rmerge                      | 0.071 (0.627)    | 0.064 (0.443)    | 0.062 (0.479)    |
| Rpim                        | 0.045 (0.416)    | 0.040 (0.294)    | 0.039 (0.320)    |
| CC ½                        | 0.998 (0.825)    | 0.999 (0.865)    | 0.999 (0.862)    |
| I/sigI                      | 12.2 (2.8)       | 14.6 (3.7)       | 14.8 (3.4)       |
| Completeness (%)            | 99.1 (97.9)      | 99.7 (99.3)      | 99.9 (99.8)      |
| Redundancy                  | 6.6 (6.2)        | 6.6 (6.2)        | 6.7 (6.2)        |
| <b>Refinement</b>           |                  |                  |                  |
| Resolution (Å)              | 39.9–1.30        | 40.2–1.30        | 35.7–1.30        |
| Unique reflections          | 55829            | 56577            | 56803            |
| Rwork/Rfree (%)             | 12.1/15.0        | 11.6/14.6        | 11.9/14.5        |
| # atoms                     | 2584             | 2606             | 2591             |
| Protein                     | 2273             | 2268             | 2276             |
| Metal (Zn)                  | 1                | 1                | 1                |
| Ligand                      | 30               | 25               | 24               |
| Water                       | 280              | 313              | 290              |
| B-factors (Å <sup>2</sup> ) | 14.1             | 12.8             | 13.9             |
| Protein                     | 13.8             | 12.4             | 13.6             |
| Metal (Zn)                  | 7.3              | 6.3              | 6.9              |
| Ligand                      | 36.0             | 19.7             | 18.6             |
| Water                       | 27.4             | 26.5             | 27.7             |
| r.m.s. deviations           |                  |                  |                  |
| Bond length (Å)             | 0.011            | 0.010            | 0.011            |
| Bond angle (°)              | 1.870            | 1.623            | 1.708            |
